# Supplementary material for: A combined miRNA–piRNA signature to detect Alzheimer’s disease
Source: PubMed Central journal article supplement (PMC6779890; doi:10.1038/s41398-019-0579-2), 2019-10-07
Supplement: 41398_2019_579_MOESM3_ESM.pdf [file 41398_2019_579_MOESM3_ESM.pdf]

| piRNA                                      | Annotation                                | Symbol    | Gene Chr | Gene Start | Gene End  | Gene Length | Gene Strand | GeneId | TranscriptId | Distance to TSS | Ensembl Gene ID | Official Full Name                               |
|--------------------------------------------|-------------------------------------------|-----------|----------|------------|-----------|-------------|-------------|--------|--------------|-----------------|-----------------|--------------------------------------------------|
| hsa_piR_019324 chr5:71851020-71851050 +    | Distal Intergenic                         | CARTPT    | chr5     | 71014990   | 71016875  | 1886        | +           | 9607   | uc003kbv.2   | 131858          | ENSG00000164326 | CART prepropeptide                               |
| hsa_piR_019949 chr11:122559947-122559977 + | Exon (uc021qrq.1/uc021qrq.1, exon 1 of 1) | UBASH3B   | chr11    | 122526398  | 122685187 | 158790      | +           | 84959  | uc001pyi.4   | -95713          | ENSG00000154127 | ubiquitin associated and SH3 domain containing B |
| hsa_piR_020364 chr10:72972395-72972420 -   | Distal Intergenic                         | PLA2G12B  | chr10    | 74694938   | 74714510  | 19573       | -           | 84647  | uc001jtf.1   | -17668          | ENSG00000138308 | phospholipase A2, group XIIB                     |
| hsa_piR_020364 chr14:102317092-102317117 + | Promoter (<=1kb)                          | ZNF839    | chr14    | 102783714  | 102809511 | 25798       | +           | 55778  | uc001ylo.3   | -260            | ENSG00000022976 | zinc finger protein 839                          |
| hsa_piR_020364 chr17:8227039-8227064 -     | 3' UTR                                    | LINC00324 | chr17    | 8123948    | 8127361   | 3414        | -           | 284029 | uc002gkp.4   | -3021           | ENSG00000178977 | long intergenic non-protein coding RNA 324       |
| hsa_piR_020364 chr2:50936204-50936229 -    | Intron (uc021vhg.1/9378, intron 21 of 22) | NRXN1     | chr2     | 50145643   | 51256332  | 1110690     | -           | 9378   | uc021vhg.1   | 92989           | ENSG00000179915 | neurexin 1                                       |
| hsa_piR_020364 chr6:27177263-27177288 -    | Exon (uc021ypd.1/uc021ypd.1, exon 1 of 1) | HIST1H2BK | chr6     | 27106072   | 27114637  | 8566        | -           | 85236  | uc003nix.2   | -30430          | ENSG00000197903 | histone cluster 1, H2bk                          |
| hsa_piR_020364 chr6:27237619-27237644 -    | Exon (uc021ypk.1/uc021ypk.1, exon 1 of 1) | POM121L2  | chr6     | 27276842   | 27280011  | 3170        | -           | 94026  | uc011dku.1   | 74612           | ENSG00000158553 | POM121 transmembrane nucleoporin-like 2          |
| hsa_piR_020364 chr6:27293892-27293917 +    | Exon (uc021ypq.1/uc021ypq.1, exon 1 of 1) | VN1R10P   | chr6     | 27292540   | 27293741  | 1202        | +           | 387316 | uc010jqt.4   | -30844          | ENSG00000220758 | vomer nasal 1 receptor 10 pseudogene             |
| hsa_piR_020364 chr6:26554122-26554147 +    | Exon (uc021ynp.1/uc021ynp.1, exon 1 of 1) | HMGNA4    | chr6     | 26538572   | 26547164  | 8593        | +           | 10473  | uc003nig.3   | 15779           | ENSG00000182952 | high mobility group nucleosomal binding domain 4 |

Supplemental Table 2: A detailed annotation of the signature piRNAs and their association with the Alzheimer's disease
